# Supplementary material for: Prevalence of Community Perinatal Psychiatrists in the US
Source: PubMed Central journal article supplement (PMC11307129; doi:10.1001/jamanetworkopen.2024.26465), 2024-08-07
Supplement: jamanetwopen-e2426465-s002.pdf [file jamanetwopen-e2426465-s002.pdf]

## Data Sharing Statement

Koire. Prevalence of Community Perinatal Psychiatrists in the US. *JAMA Netw Open*.  
Published August 07, 2024. doi:10.1001/jamanetworkopen.2024.26465

### Data

**Data available:** Yes

**Data types:** Data (not involving human participants), Data dictionary

**How to access data:** [akoire@bwh.harvard.edu](mailto:akoire@bwh.harvard.edu)

**When available:** With publication

### Supporting Documents

**Document types:** None

### Additional Information

**Who can access the data:** Anyone requesting the data

**Types of analyses:** Any purpose

**Mechanisms of data availability:** Without investigator support
